# Supplementary material
Source: MDPI journal article supplement (https://www.mdpi.com/2078-1547/8/1/10)
Supplement: s1 [file s1]

# Supplementary Materials: Electrochemical Sensor for Explosives Precursors' Detection in Water

Cloé Desmet, Agnes Degiuli, Carlotta Ferrari, Francesco Saverio Romolo, Loïc Blum and Christophe Marquette

**Table S1.** Position (potential) and amplitude (current) of the observed peaks for each target on each electrode.

|    | B01            | B08            | B15                         |
|----|----------------|----------------|-----------------------------|
| Au | −0.1V/−4μA     | −0.55V/−3.5μA  | −0.1V/−4.2μA<br>+0.25V/−1μA |
| Pt | −0.25V/+1.1μA  | Not detectable | Not detectable              |
| Pd | −0.25V/−1.6μA  | Not detectable | −0.75V/−3μA                 |
| C  | Not detectable | −0.6V/−1.1μA   | Not detectable              |

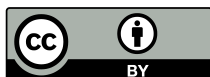

© 2017 by the authors. Licensee MDPI, Basel, Switzerland. This article is an open access article under the terms and conditions of the Creative Commons Attribution (CC BY) license (<http://creativecommons.org/licenses/by/4.0/>).
